# Supplementary material for: Anti-Inflammatory Effect of Resveratrol Derivatives via the Downregulation of Oxidative-Stress-Dependent and c-Src Transactivation EGFR Pathways on Rat Mesangial Cells
Source: MDPI journal article supplement (doi:10.3390/antiox11050835), 2022-04-25
Supplement: s1 [file s1]

# Anti-Inflammatory Effect of Resveratrol Derivatives via the Downregulation of Oxidative-Stress-Dependent and c-Src Transactivation EGFR Pathways on Rat Mesangial Cells

I-Ta Lee <sup>1,†</sup>, Horng-Chyuan Lin <sup>2,†</sup>, Tse-Hung Huang <sup>3,4,5</sup>, Chi-Nan Tseng <sup>6,7,8</sup>, Hao-Tsa Cheng <sup>8,9,10</sup>, Wen-Chung Huang <sup>3,8,11,12</sup> and Ching-Yi Cheng <sup>3,13,\*</sup>

**Citation:** Lee, I.-T.; Lin, H.-C.; Huang, T.-H.; Tseng, C.-N.; Cheng, H.-T.; Huang, W.-C.; Cheng, C.-Y. Anti-Inflammatory Effect of Resveratrol Derivatives via the Downregulation of Oxidative-Stress-Dependent and c-Src Transactivation EGFR Pathways on Rat Mesangial Cells. *Antioxidants* **2022**, *11*, 835. <https://doi.org/10.3390/antiox11050835>

Academic Editors: Maria Letizia Manca, Amparo Nacher, Mohamad Allaw, Matteo Perra and Ines Castangia

Received: 22 March 2022

Accepted: 22 April 2022

Published: 25 April 2022

**Publisher's Note:** MDPI stays neutral with regard to jurisdictional claims in published maps and institutional affiliations.

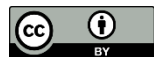

**Copyright:** © 2022 by the authors. Submitted for possible open access publication under the terms and conditions of the Creative Commons Attribution (CC BY) license (<https://creativecommons.org/licenses/by/4.0/>).

- <sup>1</sup> School of Dentistry, College of Oral Medicine, Taipei Medical University, Taipei 11031, Taiwan; itlee0128@tmu.edu.tw
  - <sup>2</sup> Department of Thoracic Medicine, Chang Gung Memorial Hospital at Linkou, Taoyuan 33305, Taiwan; College of Medicine, Chang Gung University, Taoyuan 33302, Taiwan; lhc53424@cgmh.org.tw
  - <sup>3</sup> Graduate Institute of Health Industry Technology, Research Center for Chinese Herbal Medicine and Research Center for Food and Cosmetic Safety, Chang Gung University of Science and Technology, Taoyuan 33303, Taiwan; kchuang@cgmh.org.tw (T.-H.H.); wchuang@mail.cgust.edu.tw (W.-C.H.)
  - <sup>4</sup> Department of Traditional Chinese Medicine, Chang Gung Memorial Hospital, Keelung 20401, Taiwan
  - <sup>5</sup> School of Nursing, National Taipei University of Nursing and Health Sciences, Taipei 11219, Taiwan
  - <sup>6</sup> Division of Cardiac Surgery, Department of Thoracic and Cardiovascular Surgery, Chang Gung Memorial Hospital at Linkou, Taoyuan 33305, Taiwan; chinan.tseng@cgmh.org.tw
  - <sup>7</sup> Department of Molecular Medicine and Surgery, Karolinska Institute, 17177 Stockholm, Sweden
  - <sup>8</sup> Department of Medicine, Chang Gung University, Taoyuan 33302, Taiwan; hautai@adm.cgmh.org.tw
  - <sup>9</sup> Department of Gastroenterology and Hepatology, Chang Gung Memorial Hospital at Linkou, Taoyuan 33305, Taiwan
  - <sup>10</sup> Graduate Institute of Clinical Medicine, College of Medicine, Chang Gung University, Taoyuan 33302, Taiwan
  - <sup>11</sup> Division of Allergy, Asthma and Rheumatology, Department of Pediatrics, Chang Gung Memorial Hospital at Linkou, Taoyuan 33305, Taiwan
  - <sup>12</sup> Department of Pediatrics, New Taipei Municipal TuCheng Hospital, New Taipei 23652, Taiwan; Chang Gung Memorial Hospital at Linkou, Taoyuan 33305, Taiwan
  - <sup>13</sup> Department of Pulmonary Infection and Immunology, Chang Gung Memorial Hospital at Linkou, Taoyuan 33305, Taiwan
- \* Correspondence: jennycheng@mail.cgust.edu.tw; Tel./Fax: +886-3-211-8866
- † These authors contributed equally to this work.

## Supplementary Information

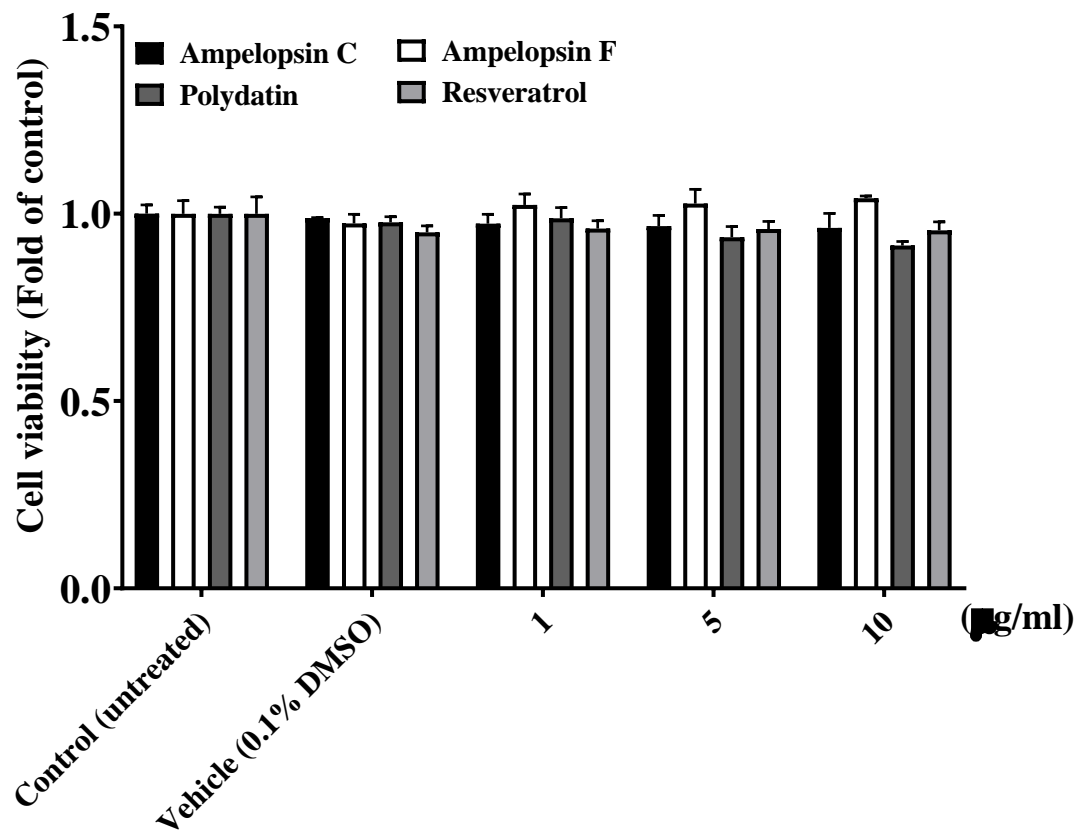

**Supplementary Figure S1. The effect of AC, AF, PD or Res on cell viability.** Cells were treated with various concentrations of AC, AF, PD or Res for 24 h. Cell viability was assayed using the MTT assay. Data are expressed as the mean  $\pm$  SD from 3 experiments and analyzed using one-way ANOVA followed by Dunnett's post hoc test.

(a)

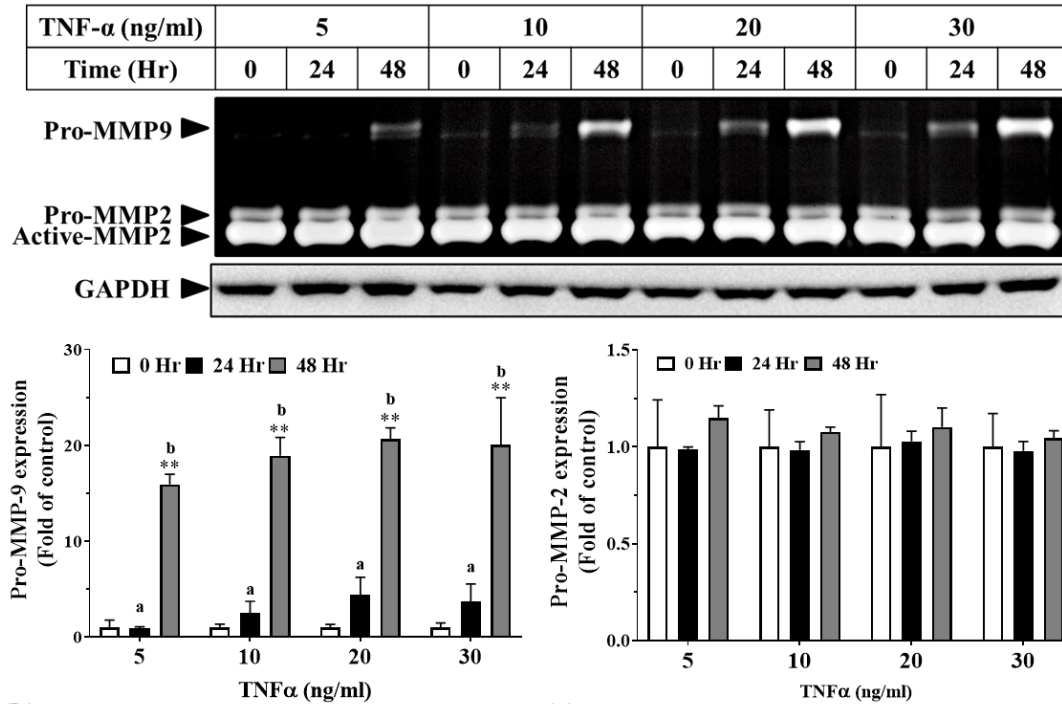

(b)

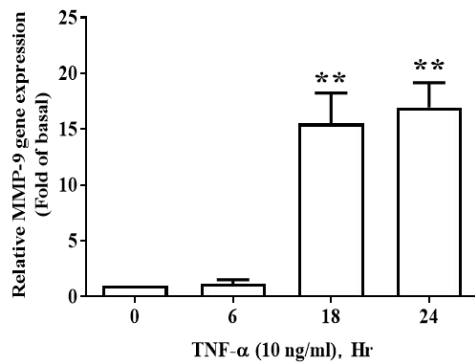

(c)

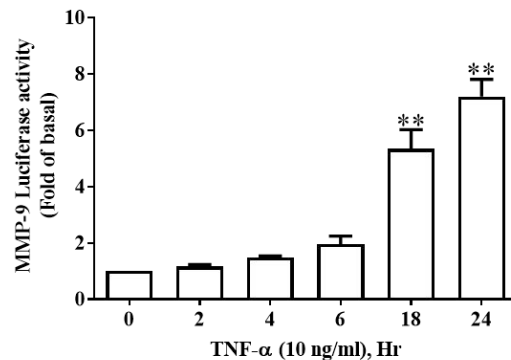

**Supplementary Figure S2. TNF- $\alpha$  induced pro-MMP-9 protein expression in a time- and dose-dependent manner.** TNF- $\alpha$  stimulated RMCs at different concentrations and times. (a) MMP-9 enzyme activity was determined by gelatin zymography, and Western blotting analyses were used to determine the expression of GAPDH (as a loading control). (b) The *MMP-9* mRNA transcripts were determined by real-time PCR. (c) Cells were transformed with the *MMP-9* promoter-luciferase plasmids by electroporation. After TNF- $\alpha$  treatment, a luciferase assay was used to analyze the promoter activity of *MMP-9*. The results are presented as the mean  $\pm$  standard deviation (SD) from 4 – 6 experiments and analyzed (a) using two-way ANOVA followed by Tukey's multiple comparisons post hoc test.  $P < 0.01$ , different letters represent significant differences between groups; (b, c) using one-way ANOVA followed by Dunnett's post hoc test. \*\*  $P < 0.01$ , compared with the untreated group.

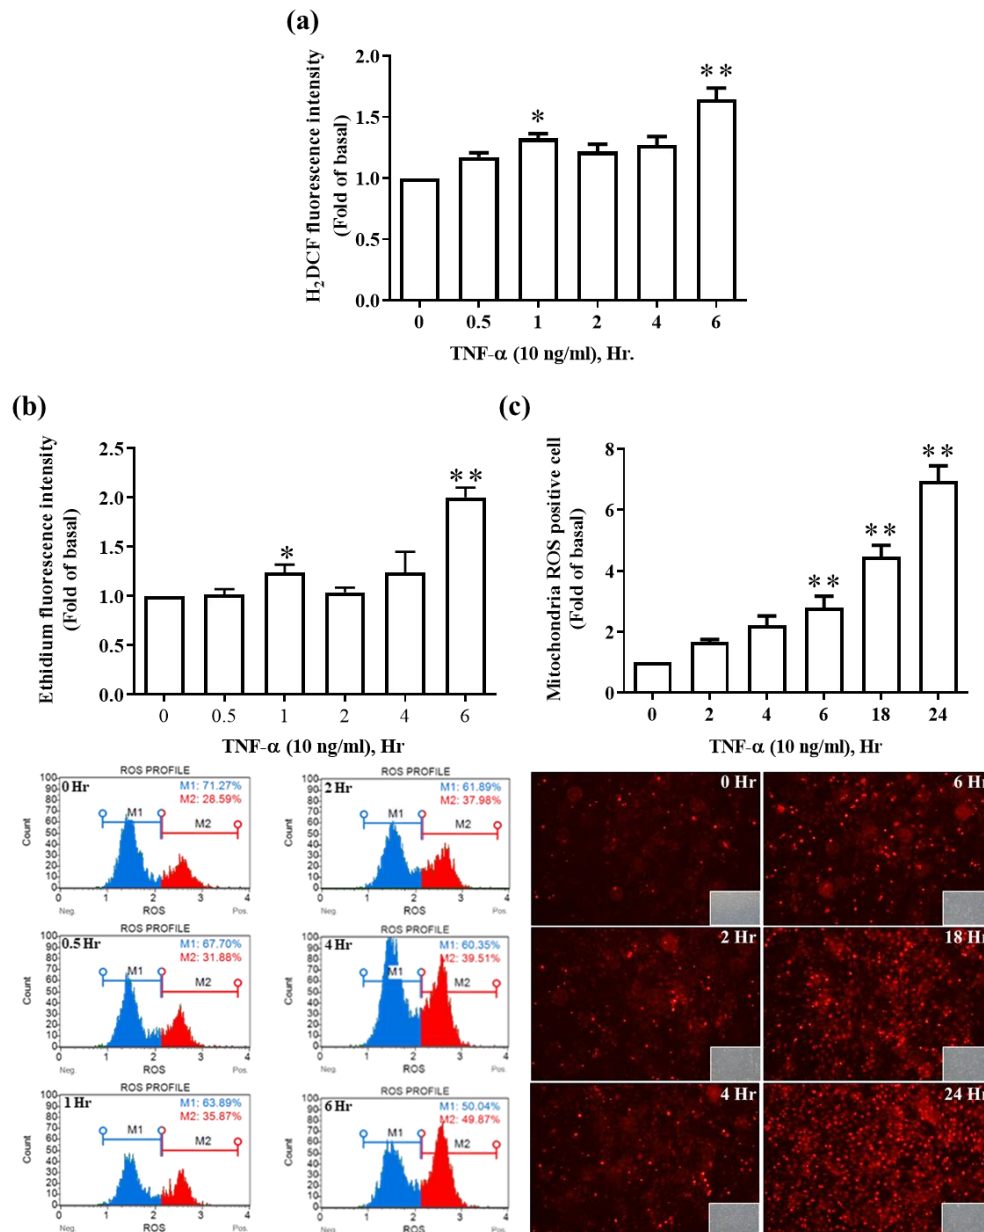

**Supplementary Figure S3. TNF- $\alpha$  induced ROS generation in a time-dependent manner.** (a) H<sub>2</sub>DCFDA (4  $\mu$ M) was added to starved cells at 37°C for 30 min and stimulated for different times with TNF- $\alpha$  (10 ng/ml). Cell lysates were collected and the H<sub>2</sub>DCF fluorescence values were read on a SpectraMax i3 microplate reader (excitation at 485 nm, emission detection at 530 nm);  $n = 4 - 8$ . (b) After the same treatment as that described in (a), cells were harvested ( $1 \times 10^6$  cells/ml), free radicals were stained with DHE, and a Muse® Cell Analyzer was used for analysis;  $n = 3 - 4$ . (c) Cells seeded on glass slides were treated as in (a), and 5  $\mu$ M MitoSOX™ Red reagent was added in the dark for 1 h at 37°C. A fluorescence microscope was used to photograph the distribution of free radicals in the cells;  $n = 4 - 7$ . The results are presented as the mean  $\pm$  SD and analyzed using one-way ANOVA followed by Dunnett's post hoc test. \*  $P < 0.05$ , \*\*  $P < 0.01$ , compared with the untreated group.
